# Supplementary material for: Optimising oxygen diffusion in non-cubic, non-dilute perovskite oxides based on BiFeO3
Source: Royal Society of Chemistry journal article supplement (doi:10.1039/c9ta08980b), 2019-01-01
Supplement: c9ta08980b1.pdf [file c9ta08980b1.pdf]

Supporting Information

## Optimising oxygen diffusion in non-cubic, non-dilute perovskite oxides based on BiFeO<sub>3</sub>

Haiwu Zhang\*, and Roger A. De Souza\*

Institute of Physical Chemistry, RWTH Aachen University

52056 Aachen, Germany

E-mail: [zhang@pc.rwth-aachen.de](mailto:zhang@pc.rwth-aachen.de), [desouza@pc.rwth-aachen.de](mailto:desouza@pc.rwth-aachen.de)

### S1. Interatomic potential parameters<sup>1-8</sup>.

The potential parameters for Bi<sup>3+</sup>-O<sup>2-</sup> were taken directly from our previous simulations of (Na<sub>0.5</sub>Bi<sub>0.5</sub>)TiO<sub>3</sub>,<sup>2</sup> whilst the short range potential parameters and the shell-model parameters for Fe<sup>3+</sup>-O<sup>2-</sup> were taken from G. C. Mather *et al.* in a study of Fe<sub>2</sub>O<sub>3</sub> modified CaTiO<sub>3</sub>.<sup>3</sup> The potential parameters for O<sup>2-</sup>-O<sup>2-</sup> were refined slightly by fitting to the experimental structure parameters of BFO, including cubic (*Pm* $\bar{3}$ *m*)<sup>9</sup>, rhombohedral (*R3c*)<sup>10</sup> and monoclinic (*Cc*)<sup>11</sup>. The cutoff is 15 Å for both MS and MD simulations.

#### 1) Potential parameters for component species

| M-O <sup>2-</sup>                 | Buckingham parameters |            |                              | Shell model parameters |                               |
|-----------------------------------|-----------------------|------------|------------------------------|------------------------|-------------------------------|
|                                   | <i>A</i> / eV         | $\rho$ / Å | <i>C</i> / eV Å <sup>6</sup> | <i>Y</i> / e           | <i>k</i> / eV Å <sup>-2</sup> |
| Bi <sup>3+</sup> -O <sup>2-</sup> | 3265.681              | 0.3305     | 18.25                        | -2.0                   | 145                           |
| Fe <sup>3+</sup> -O <sup>2-</sup> | 1156.36               | 0.3299     | 0                            | 4.97                   | 304.7                         |
| O <sup>2-</sup> -O <sup>2-</sup>  | 22764.3               | 0.149      | 27.88                        | -2.67                  | 74.92                         |

#### 2) M<sup>+</sup>/M<sup>2+</sup> dopants

| M-O <sup>2-</sup>                 | Buckingham parameters |            |                              | Shell model parameters |                               |
|-----------------------------------|-----------------------|------------|------------------------------|------------------------|-------------------------------|
|                                   | <i>A</i> / eV         | $\rho$ / Å | <i>C</i> / eV Å <sup>6</sup> | <i>Y</i> / e           | <i>k</i> / eV Å <sup>-2</sup> |
| Li <sup>+</sup> -O <sup>2-</sup>  | 292.3                 | 0.3472     | 0                            | 1.00                   | 99999                         |
| Na <sup>+</sup> -O <sup>2-</sup>  | 611.10                | 0.3535     | 0                            | 1.00                   | 99999                         |
| K <sup>+</sup> -O <sup>2-</sup>   | 902.8                 | 0.3698     | 0                            | 1.00                   | 99999                         |
| Rb <sup>+</sup> -O <sup>2-</sup>  | 1010.8                | 0.3793     | 0                            | 1.00                   | 99999                         |
| Ni <sup>2+</sup> -O <sup>2-</sup> | 641.2                 | 0.3372     | 0                            | 2.00                   | 99999                         |
| Mg <sup>2+</sup> -O <sup>2-</sup> | 821.60                | 0.3242     | 0                            | 2.00                   | 9999.9                        |
| Zn <sup>2+</sup> -O <sup>2-</sup> | 499.6                 | 0.3595     | 0                            | 2.05                   | 10.28                         |
| Co <sup>2+</sup> -O <sup>2-</sup> | 1491.7                | 0.2951     | 0                            | 3.503                  | 110.5                         |
| Mn <sup>2+</sup> -O <sup>2-</sup> | 715.8                 | 0.3464     | 0                            | 3.00                   | 81.2                          |
| Cd <sup>2+</sup> -O <sup>2-</sup> | 876.0                 | 0.35       | 0                            | N/A                    | N/A                           |
| Ca <sup>2+</sup> -O <sup>2-</sup> | 1090.4                | 0.3437     | 0                            | 3.315                  | 110.2                         |
| Sr <sup>2+</sup> -O <sup>2-</sup> | 959.1                 | 0.3721     | 0                            | 3.251                  | 71.7                          |
| Ba <sup>2+</sup> -O <sup>2-</sup> | 905.7                 | 0.3976     | 0                            | 1.46                   | 14.78                         |

### 3) M<sup>3+</sup>/M<sup>4+</sup>/M<sup>5+</sup> dopants

| Buckingham parameters             |           |            |                       | Shell model parameters |                        |
|-----------------------------------|-----------|------------|-----------------------|------------------------|------------------------|
| M-O <sup>2-</sup>                 | A / eV    | $\rho$ / Å | C / eV Å <sup>6</sup> | $\gamma$ / e           | k / eV Å <sup>-2</sup> |
| Al <sup>3+</sup> -O <sup>2-</sup> | 1114.9    | 0.3118     | 0                     | 3.00                   | 99999                  |
| Cr <sup>3+</sup> -O <sup>2-</sup> | 1690.9    | 0.3010     | 0                     | 0.97                   | 67.00                  |
| Sc <sup>3+</sup> -O <sup>2-</sup> | 1299.4    | 0.3312     | 0                     | 3.00                   | 99999                  |
| In <sup>3+</sup> -O <sup>2-</sup> | 1495.6    | 0.3310     | 4.325                 | -6.10                  | 1680.0                 |
| Lu <sup>3+</sup> -O <sup>2-</sup> | 1336.8    | 0.3551     | 0                     | 3.00                   | 99999                  |
| Y <sup>3+</sup> -O <sup>2-</sup>  | 1309.6    | 0.3462     | 0                     | 3.00                   | 99999                  |
| Gd <sup>3+</sup> -O <sup>2-</sup> | 1336.8    | 0.3551     | 0                     | 3.00                   | 99999                  |
| Nd <sup>3+</sup> -O <sup>2-</sup> | 1379.9    | 0.3601     | 0                     | 3.00                   | 99999                  |
| Pr <sup>3+</sup> -O <sup>2-</sup> | 2091.95   | 0.3399     | 0                     | 3.0                    | 99999                  |
| La <sup>3+</sup> -O <sup>2-</sup> | 1545.21   | 0.3590     | 0                     | -0.25                  | 145.0                  |
| Si <sup>4+</sup> -O <sup>2-</sup> | 1283.91   | 0.32052    | 10.66                 | 2.67                   | 2399                   |
| Ge <sup>4+</sup> -O <sup>2-</sup> | 1980.0    | 0.3172     | 53.7                  | N/A                    | N/A                    |
| Ti <sup>4+</sup> -O <sup>2-</sup> | 877.2     | 0.38096    | 9.0                   | -35.862999             | 65974.0                |
| Sn <sup>4+</sup> -O <sup>2-</sup> | 1056.8    | 0.3683     | 0                     | 1.58                   | 2037.8                 |
| Zr <sup>4+</sup> -O <sup>2-</sup> | 1608.1    | 0.3509     | 0                     | 4.00                   | 169.62                 |
| Pb <sup>4+</sup> -O <sup>2-</sup> | 2164.8    | 0.3489     | 0                     | 4.00                   | 99999                  |
| Ta <sup>5+</sup> -O <sup>2-</sup> | 1315.572  | 0.36905    | 0                     | -4.596                 | 5916.77                |
| Nb <sup>5+</sup> -O <sup>2-</sup> | 1286.9583 | 0.371525   | 0                     | -4.596                 | 5916.77                |

## S2. Crystal structure

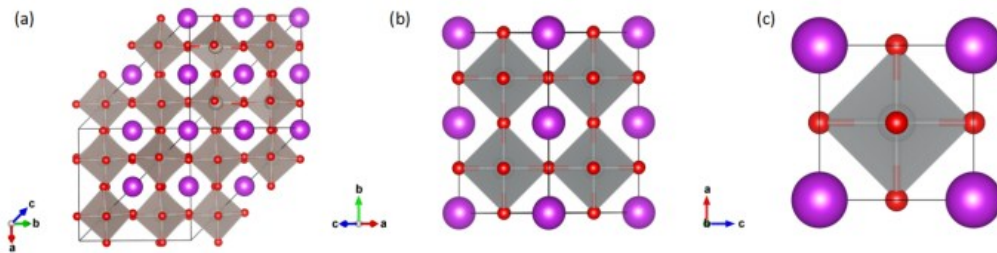

**Fig. S1.** Crystal structure of BFO: a) rhombohedral ( $R3c$ ); b) monoclinic ( $Cc$ ) and c) cubic ( $Pm\bar{3}m$ ). Key: Bi (purple); Fe (silver); oxygen (red).

**Table S1.** Calculated structural parameters and lattice energies of rhombohedral, monoclinic, and cubic BFO.

| Chemical order |                  | a / Å  | b / Å  | c / Å   | $\alpha, \beta, \gamma / ^\circ$ | Lattice energy / eV |
|----------------|------------------|--------|--------|---------|----------------------------------|---------------------|
| R3c            | cal              | 5.6325 | 5.6325 | 13.7613 | 90.000000, 90.000000, 120.000000 | -137.958181         |
|                | <sup>a</sup> exp | 5.5800 | 5.5800 | 13.8725 | 90.000000, 90.000000, 120.000000 | -                   |
| Cc             | cal              | 5.6229 | 7.9519 | 5.6229  | 90.000000, 90.000000, 90.000293  | -137.952306         |
|                | <sup>b</sup> exp | 5.6148 | 7.9725 | 5.6467  | 90.000000, 90.000000, 90.015000  | -                   |
| Pm $\bar{3}$ m | cal              | 3.9760 | -      | -       | 90.000186, 89.999306, 90.000186  | -137.952312         |
|                | <sup>c</sup> exp | 3.9916 | -      | -       | 90.000000, 89.999987, 90.000000  | -                   |

<sup>a</sup>ref. 9; <sup>b</sup>ref. 10; <sup>c</sup>ref. 11

### S3. Full list of defect equations for dopant substitution at Bi and Fe sites.

1) Monovalent (M<sup>+</sup>) cations:

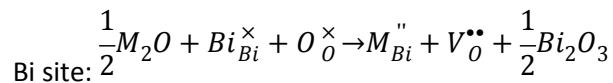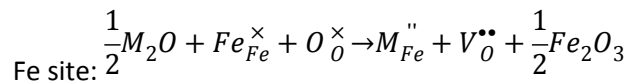

2) Divalent (M<sup>2+</sup>) cations:

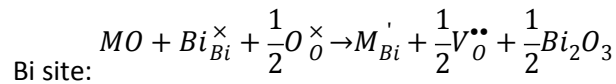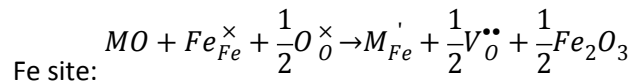

3) Trivalent (M<sup>3+</sup>) cations:

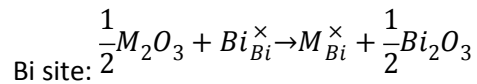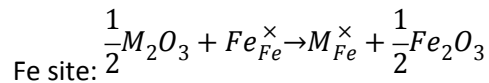

4) Tetravalent (M<sup>4+</sup>) cations:

M<sup>4+</sup> at Bi with Bi vacancy compensation:

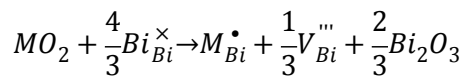

M<sup>4+</sup> at Bi with Fe vacancy compensation:

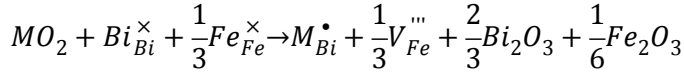

M<sup>4+</sup> at Fe with Bi vacancy compensation:

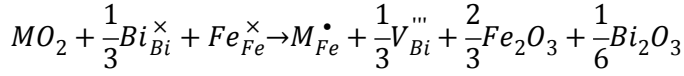

M<sup>4+</sup> at Fe with Fe vacancy compensation:

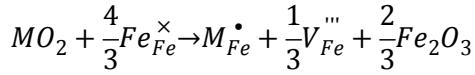

M<sup>4+</sup> at Bi with electron compensation:

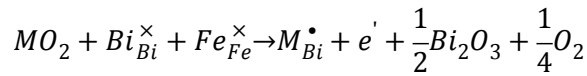

M<sup>4+</sup> at Fe with electron compensation:

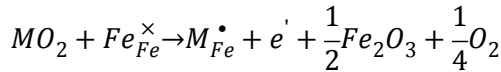

M<sup>4+</sup> at Bi with oxygen vacancy compensation:

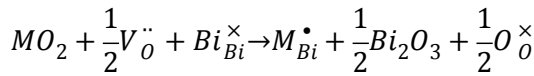

M<sup>4+</sup> at Fe with oxygen vacancy compensation:

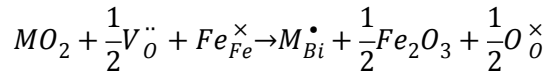

5) Pentavalent (M<sup>5+</sup>) cations:

M<sup>5+</sup> at Bi with Bi vacancy compensation:

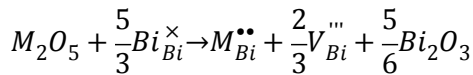

M<sup>5+</sup> at Bi with Fe vacancy compensation:

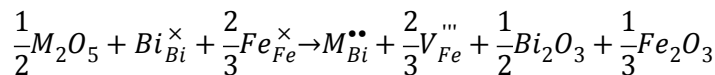

M<sup>5+</sup> at Fe with Bi vacancy compensation:

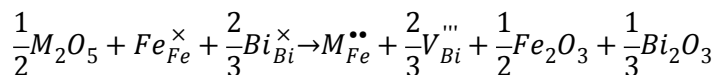

M<sup>5+</sup> at Fe with Fe vacancy compensation:

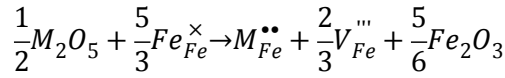

M<sup>5+</sup> at Bi with formation of electronic species:

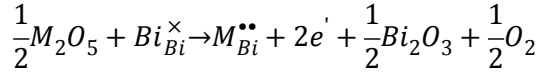

M<sup>5+</sup> at Fe with formation of electronic species:

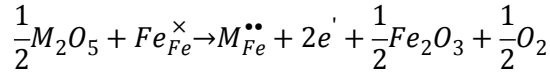

M<sup>5+</sup> at Bi with filling of existing oxygen vacancies from Bi-deficiency:

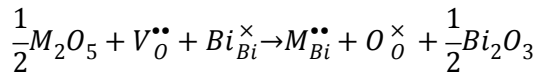

M<sup>5+</sup> at Fe with filling of existing oxygen vacancies from Bi-deficiency:

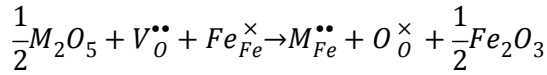

#### S4. Dopant site-selectivity

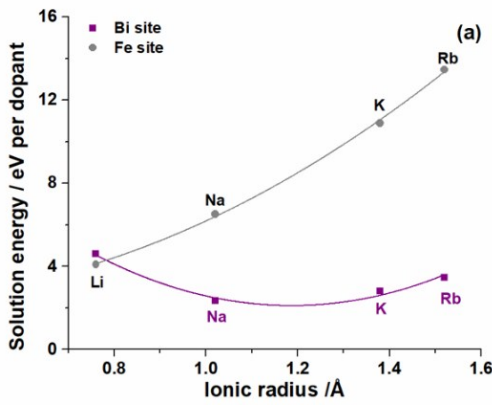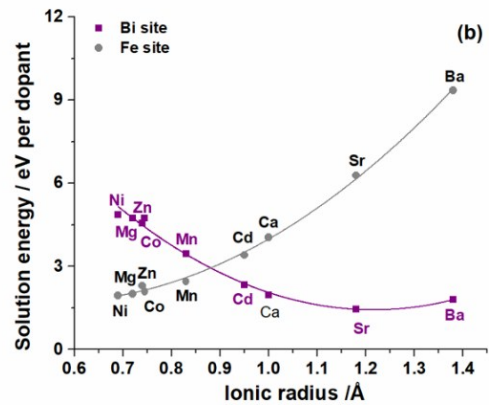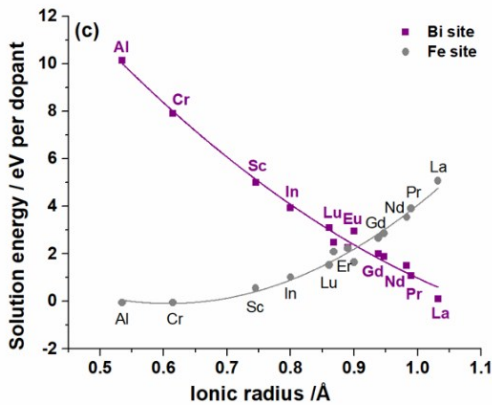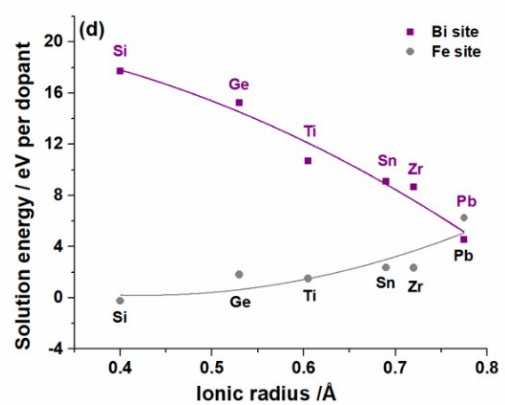

**Fig. S2.** Calculated solution energies as a function of ion radius for (a) monovalent ( $M^+$ ), (b) divalent ( $M^{2+}$ ), (c) trivalent ( $M^{3+}$ ) and (d) tetravalent ( $M^{4+}$ ) at Bi and Fe sites in rhombohedral structure. Since the dopant radii for twelve-coordination values are not available for all the ions considered, the values for six-coordination from Shannon were used.<sup>12</sup>

**Table S3.** Calculated solution energies for  $M^{4+}/M^{5+}$  dopants (in eV per dopant ion) for different charge compensation mechanisms in rhombohedral structure.

| Site incorporation | Bi site             |             |             |       | Fe site         |             |             |      |                 |
|--------------------|---------------------|-------------|-------------|-------|-----------------|-------------|-------------|------|-----------------|
|                    | Charge compensation | $V_{Bi}'''$ | $V_{Fe}'''$ | $e$   | Filling $V_O''$ | $V_{Bi}'''$ | $V_{Fe}'''$ | $e$  | Filling $V_O''$ |
| $Si^{4+}$          |                     | 17.73       | 17.78       | 20.41 | 14.25           | -0.25       | -0.20       | 2.43 | -3.73           |
| $Ti^{4+}$          |                     | 10.70       | 10.75       | 13.38 | 7.22            | 1.50        | 1.55        | 4.18 | -1.98           |
| $Pb^{4+}$          |                     | 4.54        | 4.60        | 7.23  | 1.07            | 6.25        | 6.31        | 8.94 | 2.78            |
| $Nb^{5+}$          |                     | 12.72       | 12.82       | 18.08 | 5.76            | 4.04        | 4.14        | 9.41 | -2.91           |
| $Ta^{5+}$          |                     | 10.03       | 10.13       | 15.39 | -5.75           | 1.21        | 1.31        | 6.58 | -5.75           |

### S5. Oxide ion conductivity

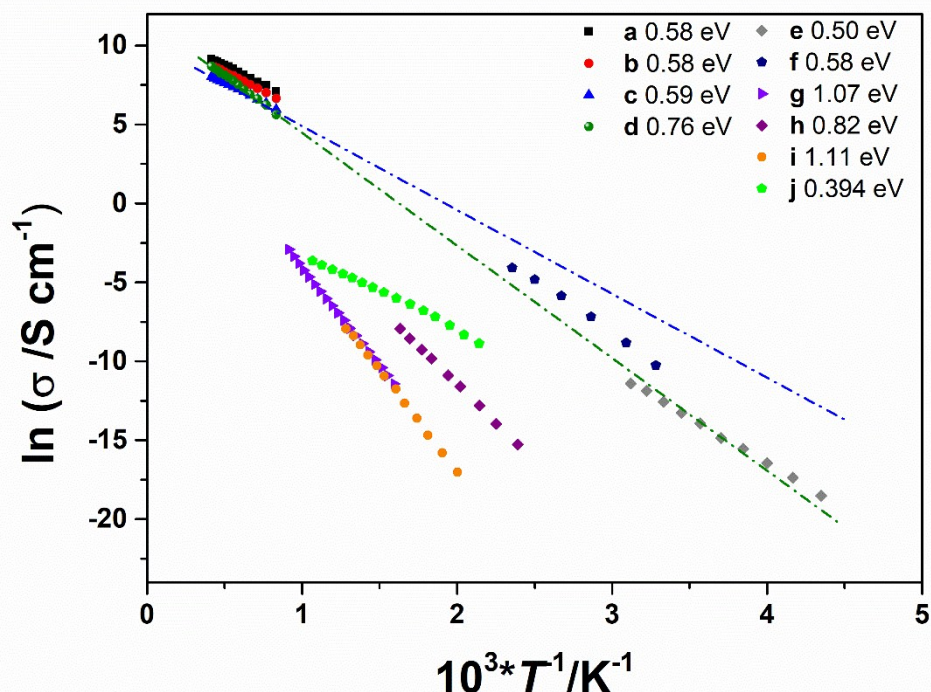

**Figure S3.** A comparison of computed conductivities with experimental results: **a-c**, this work for BFeO with oxygen-vacancy site fraction being 1%, 0.67%, 0.33%, respectively; **d** this work for Ca-substituted BiFeO<sub>3</sub>. Experimental results for **e**<sup>9</sup>, **f**<sup>13</sup> and **g**<sup>14</sup> are nominally stoichiometric (Bi/Fe=1), **h**<sup>15</sup> is doped with 3% calcium, **i** is doped with 3% niobium, **j**<sup>16</sup> is a solid solution of BiFeO<sub>3</sub> with 10% (K<sub>0.5</sub>Bi<sub>0.5</sub>)TiO<sub>3</sub> (BFO-

10KBT) measured at 10 KHz. The activation energy of BFeO showed reasonable agreement with the experimental results (**e** and **f**,  $\Delta E_{\text{mig}}$  ranges from 0.50 to 0.60 eV), demonstrating the significance of oxide ion migration in controlling the conductivity. The calculated activation energy of Ca-substituted BiFeO<sub>3</sub> (**d**) also agree well with experimental results (**h**). The dashed lines are guided to the eye only.

## References

- 1 H. Zhang, Amr. H. H. Ramandan, and R. A. De Souza, *J. Mater. Chem. A.*, 2018, **6**, 9116-9123.
- 2 G. C. Mather, M. S. Islam, and F. M. Figueiredo, *Adv. Funct. Mater.*, 2007, **17**, 905-912.
- 3 J. R. Tolchard, P. R. Slater and M. S. Islam, *Adv. Funct. Mater.*, 2007, **17**, 2564-2571.
- 4 J. M. Clark, S. Nishimura, A. Yamada, and M. Saiful Islam, *Angew. Chem. Int. Ed.*, 2012, **51**, 13149.
- 5 G. V. Lewis and C. R. A. Catlow, *J. Phys. C: Solid State Phys.*, 1985, **18**, 1149-1161.
- 6 M. Cherry, M. S. Islam, and C. R. A. Catlow, *J. Solid State Chemistry.*, 1995, **118**, 125-132.
- 7 C. A. J. Fisher, M. S. Islam, and R. J. Brook, *J. Solid State Chemistry.*, 1997, **128**, 137-141.
- 8 G. C. Mather, Craig A.J. Fisher, and M. Saiful Islam, *Chem. Mater.*, 2010, **22**, 5912-5917.
- 9 W. Chen, A. J. Williams, L. Ortega-San-Martin, M. Li, D. C. Sinclair, W. Zhou, and J. P. Attfield, *Chem. Mater.*, 2009, **21**, 2085-2093.
- 10 V. F. Freitas, H. L. C. Grande, S. N. de Medeiros, I. A. Santos, L. F. Cotica, A. A. Coelho, *J. Alloy. Comp.*, 2008, **461**, 48-52.
- 11 R. Palai, R. S. Katiyar, H. Schmid, P. Tissot, S. J. Clark, J. Robertson, S. A. T. Redfern, G. Catalan, and J. F. Scott, *Phys. Rev. B.*, 2008, **77**, 014110.
- 12 R. D. Shannon, *Acta. Crystallogr. Sect. A.*, 1976, **32**, 751-767.
- 13 Y. Jun, W.-T. Moon, C.-M. Chang, H.-S. Kim, H. S. Ryu, J. W. Kim, K. H. Kim, and S.-H. Hong, *Solid State Commun.*, 2005, **135**, 133-137.
- 14 S. M. Selbach, T. Tybell, M. Einarsrud, and T. Grande, *Adv. Mater.*, 2008, **20**, 3692-3696.
- 15 N. Masó, and A. R. West, *Chem. Mater.*, **2012**, **24**, 2127-2132.
- 16 E. T. Wefring, M.-A. Einarsrud and T. Grande, *Phys. Chem. Chem. Phys.*, 2015, **17**, 9420-9428.
